# Supplementary material for: Interventions for Individuals With High Levels of Needle Fear: Systematic Review of Randomized Controlled Trials and Quasi-Randomized Controlled Trials
Source: PubMed Central journal article supplement — Clin J Pain. 2015 Sep 17;31(Suppl 10):S109–23. doi: 10.1097/AJP.0000000000000273 (PMC4900415; doi:10.1097/ajp.0000000000000273), 2015-09-17

## Revman Plots: Exposure in vivo adult

### Fear (specific)

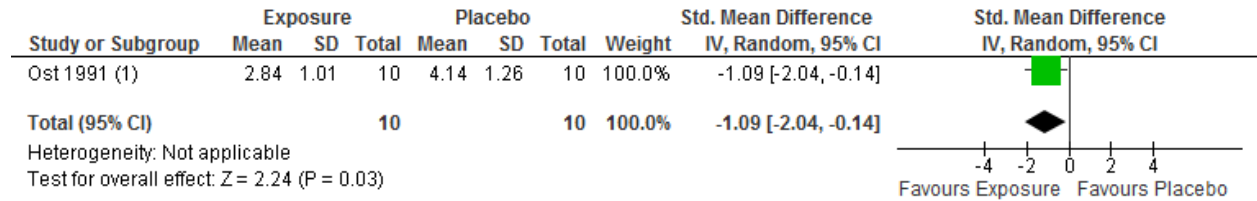

### Fear (specific) at 1 year followup

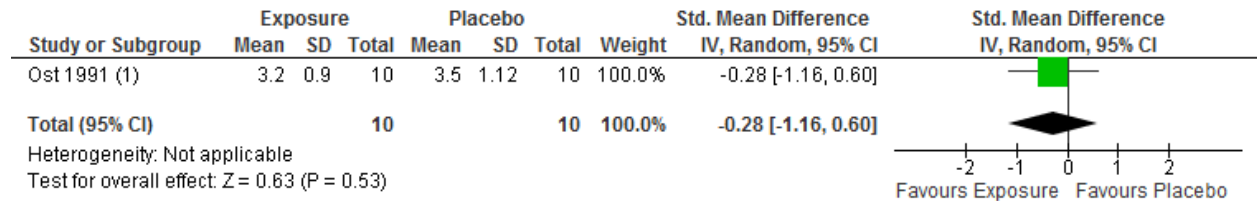

### Fear (general)

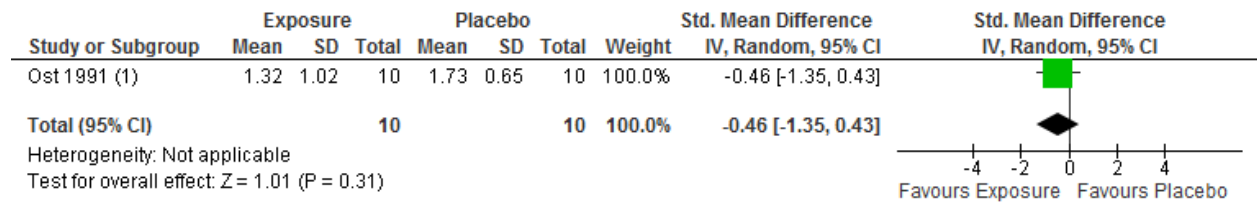

### Fear (general) at 1 year followup

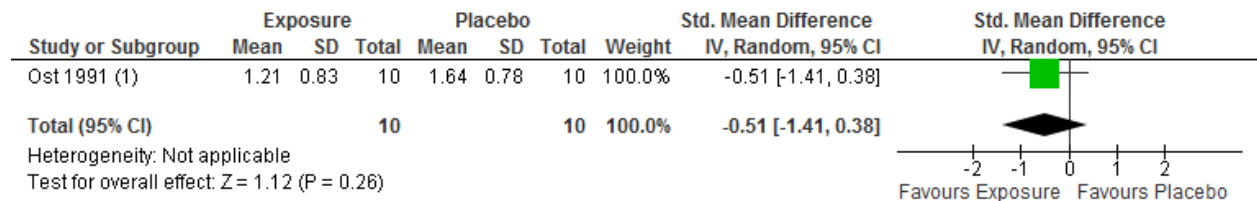

### Fainting

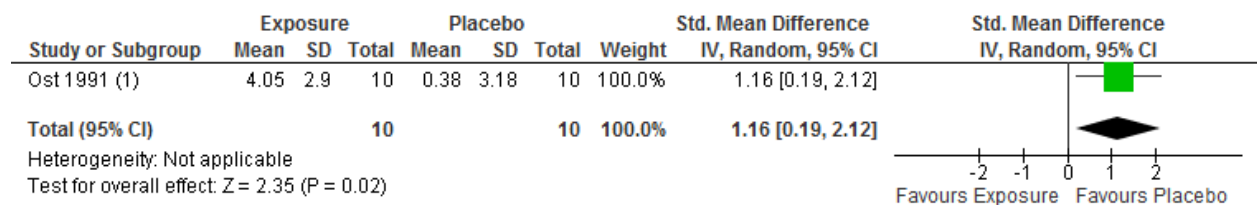

## Fainting at 1 year followup

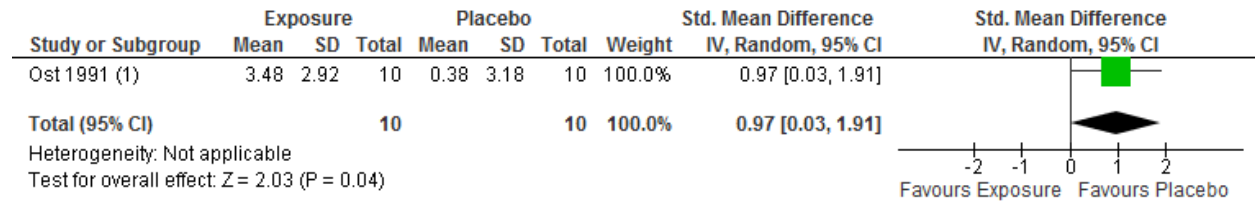

## Compliance (Behaviour Avoidance)

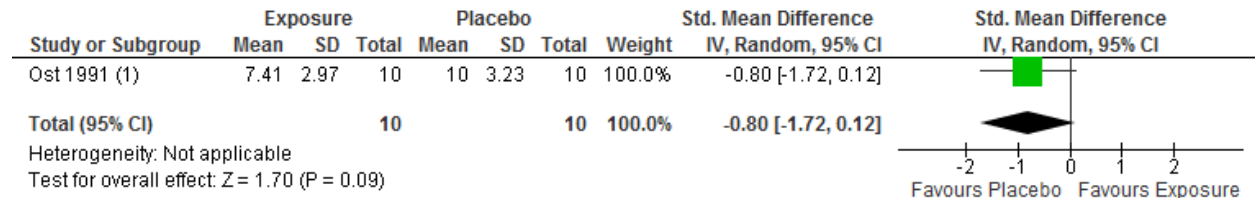

## Compliance (Behaviour Avoidance) at 1 year followup

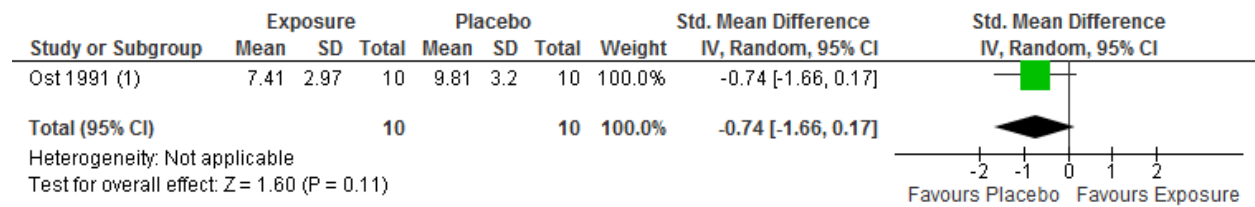

Supplement: ajp-31-s109-s002.pdf [file ajp-31-s109-s002.pdf]
