# Supplementary material for: Interventions for Individuals With High Levels of Needle Fear: Systematic Review of Randomized Controlled Trials and Quasi-Randomized Controlled Trials
Source: PubMed Central journal article supplement — Clin J Pain. 2015 Sep 17;31(Suppl 10):S109–23. doi: 10.1097/AJP.0000000000000273 (PMC4900415; doi:10.1097/ajp.0000000000000273), 2015-09-17
Supplement: ajp-31-s109-s007.pdf [file ajp-31-s109-s007.pdf]

Author(s): CMM/MN/AT

Date: 2015-02-27

Question: Should in vivo exposure-based therapy for children with high levels of needle fear vs no treatment be used for reducing vaccine injection fear in children 7 - 17 years?<sup>1</sup>

Settings: university and unclear setting

Bibliography: Flatt 2010, Leutgeb 2012, Muris 1998 (1), Ollendick 2009, Ost 2001 (1,2)

| Quality assessment                                                                                                                                                                                                                                                                                                                                     |                   |                           |                                       |                            |                      |                      | No of patients                                                              |              | Effect            |                                                         | Quality          | Importance |
|--------------------------------------------------------------------------------------------------------------------------------------------------------------------------------------------------------------------------------------------------------------------------------------------------------------------------------------------------------|-------------------|---------------------------|---------------------------------------|----------------------------|----------------------|----------------------|-----------------------------------------------------------------------------|--------------|-------------------|---------------------------------------------------------|------------------|------------|
| No of studies                                                                                                                                                                                                                                                                                                                                          | Design            | Risk of bias              | Inconsistency                         | Indirectness               | Imprecision          | Other considerations | In vivo exposure-based therapy for children with high levels of needle fear | No treatment | Relative (95% CI) | Absolute                                                |                  |            |
| <b>Fear (specific) (measured with: validated tools (Spider Phobia Questionnaire for Children SF 0-15 and full version 0-31, Self Assessment Manikin during lab-based fear inducing task 1-9, Subjective Units of Distress during lab-based fear inducing task 0-8); Better indicated by lower values)</b>                                              |                   |                           |                                       |                            |                      |                      |                                                                             |              |                   |                                                         |                  |            |
| 4                                                                                                                                                                                                                                                                                                                                                      | randomised trials | serious <sup>2</sup>      | no serious inconsistency <sup>3</sup> | very serious <sup>4</sup>  | serious <sup>5</sup> | none                 | 150                                                                         | 85           | -                 | SMD 1.71 lower (2.72 to 0.7 lower)                      | ⊕000<br>VERY LOW | CRITICAL   |
| <b>Fear (general)<sup>6</sup> (measured with: validated tools (Revised Children Manifest Anxiety Scale 0-37, State Trait Anxiety Inventory for Children 20-60, Fear Survey Schedule for Children Revised 80-240, Multidimensional Anxiety Scale for Children 0-117, Children's Anxiety Sensitivity Index 18-54); Better indicated by lower values)</b> |                   |                           |                                       |                            |                      |                      |                                                                             |              |                   |                                                         |                  |            |
| 4                                                                                                                                                                                                                                                                                                                                                      | randomised trials | very serious <sup>7</sup> | no serious inconsistency              | very serious <sup>4</sup>  | serious <sup>8</sup> | none                 | 158                                                                         | 88           | -                 | SMD 0.03 lower (0.29 lower to 0.23 higher) <sup>6</sup> | ⊕000<br>VERY LOW | IMPORTANT  |
| <b>Compliance<sup>9</sup> (measured with: validated tool (Behavioural Avoidance Test) ; Better indicated by higher values)</b>                                                                                                                                                                                                                         |                   |                           |                                       |                            |                      |                      |                                                                             |              |                   |                                                         |                  |            |
| 4                                                                                                                                                                                                                                                                                                                                                      | randomised trials | serious <sup>2</sup>      | no serious inconsistency <sup>3</sup> | very serious <sup>4</sup>  | serious <sup>5</sup> | none                 | 152                                                                         | 79           | -                 | SMD 1.55 higher (0.44 to 2.65 higher) <sup>9</sup>      | ⊕000<br>VERY LOW | IMPORTANT  |
| <b>Child Satisfaction<sup>10</sup> (measured with: rating scale 0-8; Better indicated by higher values)</b>                                                                                                                                                                                                                                            |                   |                           |                                       |                            |                      |                      |                                                                             |              |                   |                                                         |                  |            |
| 1                                                                                                                                                                                                                                                                                                                                                      | randomised trials | serious <sup>2</sup>      | no serious inconsistency              | very serious <sup>11</sup> | serious <sup>5</sup> | none                 | 85                                                                          | 70           | - <sup>10</sup>   | not pooled <sup>10</sup>                                | ⊕000<br>VERY LOW | IMPORTANT  |

| Parent Satisfaction <sup>12</sup> (measured with: rating scale 0-8; Better indicated by higher values)                                              |                       |                      |                          |                            |                      |      |    |    |                  |                          |                  |           |
|-----------------------------------------------------------------------------------------------------------------------------------------------------|-----------------------|----------------------|--------------------------|----------------------------|----------------------|------|----|----|------------------|--------------------------|------------------|-----------|
| 1                                                                                                                                                   | randomised trials     | serious <sup>2</sup> | no serious inconsistency | very serious <sup>11</sup> | serious <sup>5</sup> | none | 85 | 70 | -. <sup>12</sup> | not pooled <sup>12</sup> | ⊕○○○<br>VERY LOW | IMPORTANT |
| Pain, Distress, Fainting, Procedure Outcomes, Parent Fear, Memory, Preference (assessed with: no data were identified for these important outcomes) |                       |                      |                          |                            |                      |      |    |    |                  |                          |                  |           |
| 0                                                                                                                                                   | No evidence available |                      |                          |                            |                      | none | -  | -  | -                | -                        |                  | IMPORTANT |
|                                                                                                                                                     |                       |                      |                          |                            |                      |      |    | 0% |                  | -                        |                  |           |

<sup>1</sup> All included studies investigated the effectiveness of massed exposure treatment.

<sup>2</sup> Therapists and participants not blinded; outcome assessor not blinded

<sup>3</sup> Differences in the comparison groups may explain heterogeneity; all included studies used a wait-list control group except for Muris (1998), which used a computer-based exposure control group

<sup>4</sup> Phobias included: Spider, Various (including blood injection injury phobia n=20)

<sup>5</sup> Sample size was below the recommended optimum information size (OIS) of 400 for an effect size of 0.2

<sup>6</sup> In 1 included study (Ollendick 2009), data were combined for participants in 2 countries

<sup>7</sup> Therapists and participants not blinded; outcome assessor not blinded; In 1 study (Flatt 2010), there was the potential for attrition bias and incomplete data due to unclear summary statistics

<sup>8</sup> Confidence intervals cross the line of nonsignificance and the sample size was below the recommended optimum information size (OIS) of 400 for an effect size of 0.2

<sup>9</sup> In 1 included study (Ost 2001), pre-treatment differences were observed in the Behavioural Avoidance Test for analysis 1

<sup>10</sup> Children reported higher satisfaction with exposure-based treatment than educational support treatment (SMD= 0.66, 95% CI: 0.33, 0.98)

<sup>11</sup> Phobias included: Various (not blood injection injury phobia)

<sup>12</sup> Parents reported higher satisfaction with exposure-based treatment than educational support treatment (SMD = 0.87, 95% CI: 0.54, 1.20)
